# Supplementary material for: Monoterpene Enrichments Have Positive Impacts on Soil Bacterial Communities and the Potential of Application in Bioremediation
Source: MDPI journal article supplement (doi:10.3390/plants10112536), 2021-11-21
Supplement: s1 [file s1]

# **SUPPLEMENT**

**Tables S1-S9**

**Figures S1-S3**

## **Monoterpene enrichments have positive impacts on soil bacterial communities and the potential of application in bioremediation**

**Dimitris Chalkos<sup>1</sup>, Katerina Karamanoli<sup>2</sup> and Despoina Vokou<sup>1\*</sup>**

<sup>1</sup>Department of Ecology, School of Biology, Aristotle University of Thessaloniki, Greece

<sup>2</sup>Laboratory of Agricultural Chemistry, School of Agriculture, Faculty of Agriculture Forestry and Natural Environment,  
Aristotle University of Thessaloniki, 54124 Thessaloniki, Greece

\*Correspondence: [vokou@bio.auth.gr](mailto:vokou@bio.auth.gr)

**Table S1.** Substrates in the wells of the (i) GN2 and (ii) GP2 Biolog plates, and the way they are arranged.

| <b>(i) GN2 plates</b> |                                      |                             |                             |                              |                             |                     |                          |                        |                   |                                   |                                 |                                 |
|-----------------------|--------------------------------------|-----------------------------|-----------------------------|------------------------------|-----------------------------|---------------------|--------------------------|------------------------|-------------------|-----------------------------------|---------------------------------|---------------------------------|
| <b>Well</b>           | <b>Substrates</b>                    |                             |                             |                              |                             |                     |                          |                        |                   |                                   |                                 |                                 |
|                       | <b>1</b>                             | <b>2</b>                    | <b>3</b>                    | <b>4</b>                     | <b>5</b>                    | <b>6</b>            | <b>7</b>                 | <b>8</b>               | <b>9</b>          | <b>10</b>                         | <b>11</b>                       | <b>12</b>                       |
| <b>A</b>              | water                                | $\alpha$ -cyclo-dextrin     | dextrin                     | glycogen                     | tween 40                    | tween 80            | N-acetyl-D-galactosamine | N-acetyl-D-glucosamine | adonitol          | L-arabinose                       | D-arabitol                      | D-cellobiose                    |
| <b>B</b>              | i-erythritol                         | D-fructose                  | L-fucose                    | D-galactose                  | gentio-biose                | $\alpha$ -D-glucose | <i>m</i> -inositol       | $\alpha$ -D-lactose    | lactulose         | maltose                           | D-mannitol                      | D-mannose                       |
| <b>C</b>              | D-melibiose                          | $\beta$ -methyl-D-glucoside | D-psicose                   | D-raffinose                  | L-rhamnose                  | D-sorbitol          | sucrose                  | D-trehalose            | turanose          | xylitol                           | pyruvic acid methyl ester       | succinic acid mono-methyl ester |
| <b>D</b>              | acetic acid                          | <i>cis</i> -aconitic acid   | citric acid                 | formic acid                  | D-galactonic acid lactone   | D-galacturonic acid | D-gluconic acid          | D-glucosaminic acid    | D-glucuronic acid | $\alpha$ -hydroxy butyric acid    | $\beta$ -hydroxy butyric acid   | $\gamma$ -hydroxybutyric acid   |
| <b>E</b>              | <i>p</i> -hydroxy phenyl-acetic acid | itaconic acid               | $\alpha$ -keto-butyric acid | $\alpha$ -keto glutaric acid | $\alpha$ -keto valeric acid | D,L-lactic acid     | malonic acid             | propionic acid         | quinic acid       | D-saccharic acid                  | sebacic acid                    | succinic acid                   |
| <b>F</b>              | bromo-succinic acid                  | succinamic acid             | glucuronamide               | L-alaninamide                | D-alanine                   | L-alanine           | L-alanyl glycine         | L-asparagine           | L-aspartic acid   | L-glutamic acid                   | glycyl-L-aspartic acid          | glycyl-L-glutamic acid          |
| <b>G</b>              | L-histidine                          | hydroxy-L-proline           | L-leucine                   | L-ornithine                  | L-phenyl alanine            | L-proline           | L-pyrog glutamic acid    | D-serine               | L-serine          | L-threonine                       | D,L-carnitine                   | $\gamma$ -amino butyric acid    |
| <b>H</b>              | urocanic acid                        | inosine                     | uridine                     | thymidine                    | phenylethyl amine           | putrescine          | 2-amino-ethanol          | 2,3-butane-diol        | glycerol          | D,L- $\alpha$ -glycerol phosphate | $\alpha$ -D-glucose-1-phosphate | D-glucose-6-phosphate           |

(ii) GP2 Plates

| Well | Substrates                  |                              |                        |                  |              |                             |                                 |                               |                                |                                      |                                   |                                   |
|------|-----------------------------|------------------------------|------------------------|------------------|--------------|-----------------------------|---------------------------------|-------------------------------|--------------------------------|--------------------------------------|-----------------------------------|-----------------------------------|
|      | 1                           | 2                            | 3                      | 4                | 5            | 6                           | 7                               | 8                             | 9                              | 10                                   | 11                                | 12                                |
| A    | water                       | $\alpha$ -cyclo-dextrin      | $\beta$ -cyclo-dextrin | dextrin          | glycogen     | inulin                      | mannan                          | tween 40                      | tween 80                       | N-acetyl-D-glucos-amine              | N-acetyl- $\beta$ -D-man-nosamine | amy-gdalin                        |
| B    | L-arabinose                 | D-arabitol                   | arbutin                | D-cellobiose     | D-fructose   | L-fucose                    | D-galactose                     | D-galactu-ronic acid          | gentio-biose                   | D-gluconic acid                      | $\alpha$ -D-glucose               | <i>m</i> -inositol                |
| C    | $\alpha$ -D-lactose         | lactulose                    | maltose                | malto-triose     | D-mannitol   | D-mannose                   | D-melezitose                    | D-melibiose                   | $\alpha$ -methyl-D-galactoside | $\beta$ -methyl-D-galactoside        | 3-methyl glucose                  | $\alpha$ -methyl-D-glucoside      |
| D    | $\beta$ -methyl-D-glucoside | $\alpha$ -methyl-D-mannoside | palatinose             | D-psicose        | D-raffinose  | L-rhamnose                  | D-ribose                        | salicin                       | sedo-heptulosan                | D-sorbitol                           | stachyose                         | sucrose                           |
| E    | D-tagatose                  | D-trehalose                  | turanose               | xylitol          | D-xylose     | acetic acid                 | $\alpha$ -hydroxy-butyric acid  | $\beta$ -hydroxy-butyric acid | $\gamma$ -hydroxy butyric Acid | <i>p</i> -hydroxy-phenyl-acetic acid | $\alpha$ -keto-glutaric acid      | $\alpha$ -keto-valeric acid       |
| F    | lactamide                   | D-lactic acid methyl ester   | L-lactic acid          | D-malic acid     | L-malic acid | pyruvatic acid methyl ester | succinic acid mono-methyl ester | propionic acid                | pyruvic acid                   | succinamic acid                      | succinic acid                     | N-acetyl-L-glutamic acid          |
| G    | L-alanin-amide              | D-alanine                    | L-alanine              | L-alanyl-glycine | L-asparagine | L-glutamic acid             | glycyl-L-glutamic acid          | L-pyro-glutamic acid          | L-serine                       | putrescine                           | 2,3-butanediol                    | glycerol                          |
| H    | adenosine                   | 2'-deoxy adenosine           | inosine                | thymidine        | uridine      | adenosine-5'-mono-phosphate | thymidine-5'-mono-phosphate     | uridine-5'-mono-phosphate     | D-fructose-6-phosphate         | $\alpha$ -D-glucose-1-phosphate      | D-glucose-6-phosphate             | D-L- $\alpha$ -glycerol phosphate |

**Table S2.** Isolated bacterial strains, their morphological, chemical, and biological features and identification after the Biolog system. Empty cells correspond to strains that could not be identified as the similarity index was lower than 0.5. The codes<sup>1</sup> are same to those in Figs 1,2,3 and S1,S2,S3, where the participation of each strain in the control and treated soil samples is given.

| Code | Gram | Shape    | Catalase | Oxidase | Endospores | Molility | Colour       | Identification with the Biolog system       |                 |                  |
|------|------|----------|----------|---------|------------|----------|--------------|---------------------------------------------|-----------------|------------------|
|      |      |          |          |         |            |          |              | Bacterial strain                            | Probability (%) | Similarity index |
| MF1  | -    | bacillus | +        | +       | -          | -        | pink         | <i>Burkholderia glumae</i>                  | 99              | 0.642            |
| MF2  | +    | coccus   | +        | -       | -          | -        | purple       | <i>Micrococcus diversus</i>                 | 99              | 0.583            |
| MF3  | +    | bacillus | +        | -       | +          | +        | creamy white | <i>Brevibacterium mcbrellneri</i>           | 99              | 0.543            |
| MF4  | -    | coccus   | +        | -       | -          | +        | yellow       |                                             |                 |                  |
| MF5  | -    | bacillus | +        | -       | +          | +        | brown        |                                             |                 |                  |
| MF6  | -    | bacillus | +        | -       | +          | +        | white        | <i>Pseudomonas caricapapayae (syringae)</i> | 99              | 0.651            |
| MF7  | -    | coccus   | +        | -       | -          | -        | orange       |                                             |                 |                  |
| MC1  | -    | bacillus | +        | +       | -          | -        | pink         | <i>Burkholderia glumae</i>                  | 99              | 0.642            |
| MC2  | +    | coccus   | +        | -       | -          | -        | purple       | <i>Micrococcus diversus</i>                 | 99              | 0.583            |
| MC3  | +    | bacillus | +        | -       | +          | +        | creamy white | <i>Brevibacterium mcbrellneri</i>           | 99              | 0.543            |
| MC4  | -    | coccus   | +        | -       | -          | +        | yellow       |                                             |                 |                  |
| MC5  | -    | bacillus | +        | -       | +          | +        | white        | <i>Pseudomonas caricapapayae (syringae)</i> | 99              | 0.651            |
| MC6  | -    | coccus   | +        | -       | -          | -        | orange       |                                             |                 |                  |
| MP1  | -    | bacillus | +        | +       | -          | -        | pink         | <i>Burkholderia glumae</i>                  | 99              | 0.642            |
| MP2  | +    | coccus   | +        | -       | -          | -        | purple       | <i>Micrococcus diversus</i>                 | 99              | 0.583            |
| MP3  | +    | bacillus | +        | -       | +          | +        | creamy white | <i>Brevibacterium mcbrellneri</i>           | 99              | 0.543            |
| MP4  | -    | coccus   | +        | -       | -          | +        | yellow       |                                             |                 |                  |
| MP5  | -    | bacillus | +        | -       | +          | +        | white        | <i>Pseudomonas caricapapayae (syringae)</i> | 99              | 0.651            |
| MP6  | -    | coccus   | +        | -       | -          | -        | orange       |                                             |                 |                  |
| OF1  | +    | bacillus | +        | -       | -          | -        | pink         | <i>Rhodococcus ruber</i>                    | 97              | 0.809            |
| OF2  | +    | coccus   | +        | -       | -          | -        | purple       | <i>Micrococcus diversus</i>                 | 99              | 0.583            |
| OF3  | +    | bacillus | +        | -       | -          | +        | creamy white | <i>Tsukamurella inchoensis</i>              | 99              | 0.520            |
| OF4  | -    | coccus   | +        | -       | -          | +        | yellow       |                                             |                 |                  |

|     |   |          |   |   |   |   |              |                                             |    |       |
|-----|---|----------|---|---|---|---|--------------|---------------------------------------------|----|-------|
| OF5 | - | bacillus | + | - | + | + | white        | <i>Pseudomonas caricapapayae (syringae)</i> | 99 | 0.651 |
| OF6 | - | bacillus | + | - | + | + | brown        |                                             |    |       |
| OC1 | + | bacillus | + | - | - | - | pink         | <i>Rhodococcus ruber</i>                    | 97 | 0.809 |
| OC2 | + | coccus   | + | - | - | - | purple       | <i>Micrococcus diversus</i>                 | 99 | 0.583 |
| OC3 | + | bacillus | + | - | - | + | creamy white | <i>Tsukamurella inchoensis</i>              | 99 | 0.520 |
| OC4 | - | coccus   | + | - | - | + | yellow       |                                             |    |       |
| OC5 | - | bacillus | + | - | + | + | white        | <i>Pseudomonas caricapapayae (syringae)</i> | 99 | 0.651 |
| OC6 | - | coccus   | + | - | - | - | orange       |                                             |    |       |
| OP1 | + | bacillus | + | - | - | - | pink         | <i>Rhodococcus ruber</i>                    | 97 | 0.809 |
| OP2 | + | coccus   | + | - | - | - | purple       | <i>Micrococcus diversus</i>                 | 99 | 0.583 |
| OP3 | + | bacillus | + | - | - | + | creamy white | <i>Tsukamurella inchoensis</i>              | 99 | 0.520 |
| OP4 | - | coccus   | + | - | - | + | yellow       |                                             |    |       |
| OP5 | - | bacillus | + | - | + | + | white        | <i>Pseudomonas caricapapayae (syringae)</i> | 99 | 0.651 |
| OP6 | - | coccus   | + | - | - | - | orange       |                                             |    |       |
| RF1 | - | bacillus | + | + | - | - | pink         | <i>Burkholderia glumae</i>                  | 99 | 0.642 |
| RF2 | - | coccus   | + | + | + | + | purple       | <i>Variovorax paradoxus</i>                 | 94 | 0.505 |
| RF3 | + | coccus   | + | - | - | - | creamy white | <i>Micrococcus luteus</i>                   | 99 | 0.578 |
| RF4 | + | coccus   | + | - | - | + | yellow       |                                             |    |       |
| RF5 | - | bacillus | + | - | + | + | white        | <i>Pseudomonas caricapapayae (syringae)</i> | 99 | 0.651 |
| RF6 | - | bacillus | + | - | + | + | brown        |                                             |    |       |
| RC1 | - | bacillus | + | + | - | - | pink         | <i>Burkholderia glumae</i>                  | 99 | 0.642 |
| RC2 | - | coccus   | + | + | + | + | purple       | <i>Variovorax paradoxus</i>                 | 94 | 0.505 |
| RC3 | + | coccus   | + | - | - | - | creamy white | <i>Micrococcus luteus</i>                   | 99 | 0.578 |
| RC4 | + | coccus   | + | - | - | + | yellow       |                                             |    |       |
| RC5 | - | bacillus | + | - | + | + | white        | <i>Pseudomonas caricapapayae (syringae)</i> | 99 | 0.651 |
| RC6 | - | coccus   | + | - | - | - | orange       |                                             |    |       |
| RP1 | - | bacillus | + | + | - | - | pink         | <i>Burkholderia glumae</i>                  | 99 | 0.642 |
| RP2 | - | coccus   | + | + | + | + | purple       | <i>Variovorax paradoxus</i>                 | 94 | 0.505 |
| RP3 | + | coccus   | + | - | - | - | creamy white | <i>Micrococcus luteus</i>                   | 99 | 0.578 |
| RP4 | + | coccus   | + | - | - | + | yellow       |                                             |    |       |

|     |   |          |   |   |   |   |              |                                             |    |       |
|-----|---|----------|---|---|---|---|--------------|---------------------------------------------|----|-------|
| RP5 | - | bacillus | + | - | + | + | white        | <i>Pseudomonas caricapapayae (syringae)</i> | 99 | 0.651 |
| RP6 | - | coccus   | + | - | - | - | orange       |                                             |    |       |
| PF1 | + | bacillus | + | - | - | - | pink         | <i>Corynebacterium nitrilophilus</i>        | 99 | 0.601 |
| PF2 | + | coccus   | + | - | + | + | purple       |                                             |    |       |
| PF3 | + | bacillus | + | - | - | + | creamy white | <i>Tsukamurella inchoensis</i>              | 99 | 0.520 |
| PF4 | - | bacillus | + | - | - | + | yellow       | <i>Burkholderia gladioli</i>                | 99 | 0.584 |
| PF5 | - | bacillus | + | + | + | + | white        | <i>Burkholderia glumae</i>                  | 99 | 0.607 |
| PF6 | - | coccus   | + | - | - | - | orange       |                                             |    |       |
| PC1 | + | bacillus | + | - | - | - | pink         | <i>Corynebacterium nitrilophilus</i>        | 99 | 0.601 |
| PC2 | + | coccus   | + | - | + | + | purple       |                                             |    |       |
| PC3 | + | bacillus | + | - | - | + | creamy white | <i>Tsukamurella inchoensis</i>              | 99 | 0.520 |
| PC4 | - | bacillus | + | - | - | + | yellow       | <i>Burkholderia gladioli</i>                | 99 | 0.584 |
| PC5 | - | bacillus | + | + | + | + | white        | <i>Burkholderia glumae</i>                  | 99 | 0.607 |
| PC6 | - | coccus   | + | - | - | - | orange       |                                             |    |       |
| PP1 | + | bacillus | + | - | - | - | pink         | <i>Corynebacterium nitrilophilus</i>        | 99 | 0.601 |
| PP2 | + | coccus   | + | - | + | + | purple       |                                             |    |       |
| PP3 | + | bacillus | + | - | - | + | creamy white | <i>Tsukamurella inchoensis</i>              | 99 | 0.520 |
| PP4 | - | bacillus | + | - | - | + | yellow       | <i>Burkholderia gladioli</i>                | 99 | 0.584 |
| PP5 | - | bacillus | + | + | + | + | white        | <i>Burkholderia glumae</i>                  | 99 | 0.607 |
| PP6 | - | coccus   | + | - | - | - | orange       |                                             |    |       |
| SF1 | + | bacillus | + | - | - | + | pink         |                                             |    |       |
| SF2 | - | bacillus | + | - | - | + | purple       | <i>Pantoea stewartii (Erwinia)</i>          | 99 | 0.540 |
| SF3 | + | bacillus | + | - | - | + | creamy white | <i>Tsukamurella inchoensis</i>              | 99 | 0.520 |
| SF4 | - | coccus   | + | + | - | - | yellow       | <i>Neisseria canis</i>                      | 94 | 0.645 |
| SF5 | - | bacillus | + | - | + | - | white        |                                             |    |       |
| SF6 | - | coccus   | + | - | - | - | orange       |                                             |    |       |
| SC1 | + | bacillus | + | - | - | + | pink         |                                             |    |       |
| SC2 | - | bacillus | + | - | - | + | purple       | <i>Pantoea stewartii (Erwinia)</i>          | 99 | 0.540 |
| SC3 | + | bacillus | + | - | - | + | creamy white | <i>Tsukamurella inchoensis</i>              | 99 | 0.520 |
| SC4 | - | coccus   | + | + | - | - | yellow       | <i>Neisseria canis</i>                      | 94 | 0.645 |

|     |   |          |   |   |   |   |              |                                         |    |       |
|-----|---|----------|---|---|---|---|--------------|-----------------------------------------|----|-------|
| SC5 | - | bacillus | + | - | + | - | white        |                                         |    |       |
| SC6 | - | coccus   | + | - | - | - | orange       |                                         |    |       |
| SP1 | + | bacillus | + | - | - | + | pink         |                                         |    |       |
| SP2 | - | bacillus | + | - | - | + | purple       | <i>Pantoea stewartii</i> (Erwinia)      | 99 | 0.540 |
| SP3 | + | bacillus | + | - | - | + | creamy white | <i>Tsukamurella inchoensis</i>          | 99 | 0.520 |
| SP4 | - | coccus   | + | + | - | - | yellow       | <i>Neisseria canis</i>                  | 94 | 0.645 |
| SP5 | - | bacillus | + | - | + | - | white        |                                         |    |       |
| SP6 | - | coccus   | + | - | - | - | orange       |                                         |    |       |
| DF1 | - | bacillus | + | + | - | + | pink         | <i>Rhizobium rhizogenes</i>             | 99 | 0.505 |
| DF2 | + | bacillus | + | - | - | - | purple       | <i>Corynebacterium lypophylophlavum</i> | 92 | 0.510 |
| DF3 | + | bacillus | + | - | - | + | creamy white | <i>Tsukamurella inchoensis</i>          | 99 | 0.520 |
| DF4 | - | coccus   | + | + | - | - | yellow       |                                         |    |       |
| DF5 | - | bacillus | + | - | - | + | white        | <i>Buttiauxella gaviniae</i>            | 75 | 0.62  |
| DF6 | - | coccus   | + | - | - | - | orange       |                                         |    |       |
| DC1 | - | bacillus | + | + | - | + | pink         | <i>Rhizobium rhizogenes</i>             | 99 | 0.505 |
| DC2 | + | bacillus | + | - | - | - | purple       | <i>Corynebacterium lypophylophlavum</i> | 92 | 0.510 |
| DC3 | + | bacillus | + | - | - | + | creamy white | <i>Tsukamurella inchoensis</i>          | 99 | 0.520 |
| DC4 | - | coccus   | + | + | - | - | yellow       |                                         |    |       |
| DC5 | - | bacillus | + | - | - | + | white        | <i>Buttiauxella gaviniae</i>            | 75 | 0.62  |
| DC6 | - | coccus   | + | - | - | - | orange       |                                         |    |       |
| DP1 | - | bacillus | + | + | - | + | pink         | <i>Rhizobium rhizogenes</i>             | 99 | 0.505 |
| DP2 | + | bacillus | + | - | - | - | purple       | <i>Corynebacterium lypophylophlavum</i> | 92 | 0.510 |
| DP3 | + | bacillus | + | - | - | + | creamy white | <i>Tsukamurella inchoensis</i>          | 99 | 0.520 |
| DP4 | - | coccus   | + | + | - | - | yellow       |                                         |    |       |
| DP5 | - | bacillus | + | - | - | + | white        | <i>Buttiauxella gaviniae</i>            | 75 | 0.62  |
| DP6 | - | coccus   | + | - | - | - | orange       |                                         |    |       |

<sup>1</sup> The first letter of the codes corresponds to the ecosystem from which strains were isolated [mixed deciduous forest (M), oak forest (O), riparian forest (R), phrygana (P), sandy shore (S), desert (D)] and the second letter to the compound examined [fenchone (F), 1,8-cineol (C) and  $\alpha$ -pinene (P)]; the number corresponds to each of the six (seven in the case of the mixed deciduous forest and fenchone) main bacterial strains that were isolated from the soil samples of the different treatments, which were also main strains in the control soil samples.

**Table S3.** Multivariate analysis of variance (MANOVA) for soil respiration (CO<sub>2</sub> release) and bacterial abundance (of culturable strains) data from oak forest (O), mixed deciduous forest (M), riparian forest (R), phrygana (P), sandy shore (S) and desert (D) soil samples, enriched or not with fenchone, at different sampling times; EF = enrichment with fenchone, ST = sampling time; (\*) significance at  $p < 0.05$ , (\*\*) at  $p < 0.01$ , (\*\*\*), at  $p < 0.001$ , (NS) not significant.

| Effect                   | df | Soil respiration |     |     |     |     |     | df | Bacterial abundance |     |     |     |     |     |
|--------------------------|----|------------------|-----|-----|-----|-----|-----|----|---------------------|-----|-----|-----|-----|-----|
|                          |    | O                | M   | R   | P   | S   | D   |    | M                   | O   | R   | P   | S   | D   |
| Enrichment with fenchone | 1  | ***              | *** | *** | *** | *** | *** | 1  | ***                 | *** | **  | *   | *** | *** |
| Sampling time            | 5  | ***              | *** | *** | *** | *** | *** | 6  | ***                 | *** | *** | *** | *** | *** |
| EF x ST                  | 5  | ***              | *** | *** | *** | *** | *** | 6  | ***                 | *** | *** | *** | *** | *** |

**Table S4.** Multivariate analysis of variance (MANOVA) for bacterial community structure data (relative participation of the main culturable bacteria) from oak forest (O), mixed deciduous forest (M), riparian forest (R), phrygana (P), sandy shore (S) and desert (D) soil samples, enriched or not with fenchone, at different sampling times; EF = enrichment with fenchone, ST = sampling time, RP = relative participation of bacterial strains; (\*) significance at  $p < 0.05$ , (\*\*) at  $p < 0.01$ , (\*\*\*), at  $p < 0.001$ , (NS) not significant.

| Effect                   | df | Community structure |  | df | Community structure |     |     |     |     |
|--------------------------|----|---------------------|--|----|---------------------|-----|-----|-----|-----|
|                          |    | M                   |  |    | O                   | R   | P   | S   | D   |
| Relative participation   | 6  | ***                 |  | 5  | ***                 | *** | *** | *** | *** |
| Enrichment with fenchone | 1  | NS                  |  | 1  | NS                  | NS  | NS  | NS  | NS  |
| RP X EF                  | 6  | ***                 |  | 5  | ***                 | *** | *** | *** | *** |
| Sampling time            | 6  | NS                  |  | 6  | NS                  | NS  | NS  | NS  | NS  |
| ST X RP                  | 36 | ***                 |  | 30 | ***                 | *** | *** | *** | *** |
| ST X EF                  | 6  | NS                  |  | 6  | NS                  | NS  | NS  | NS  | NS  |
| ST X RP X EF             | 36 | ***                 |  | 30 | ***                 | *** | *** | *** | *** |



**Table S5.** Multivariate analysis of variance (MANOVA) for soil respiration (CO<sub>2</sub> release) and bacterial abundance (of culturable strains) data from oak forest (O), mixed deciduous forest (M), riparian forest (R), phrygana (P), sandy shore (S) and desert (D) soil samples, enriched or not with 1,8-cineol, at different sampling times; EC = enrichment with 1,8-cineol, ST = sampling time; (\*) significance at  $p < 0.05$ , (\*\*) at  $p < 0.01$ , (\*\*\*) at  $p < 0.001$ , (NS) not significant.

| Effect                     | df | Soil respiration |     |     |     |     |     | df | Bacterial abundance |     |     |     |     |     |
|----------------------------|----|------------------|-----|-----|-----|-----|-----|----|---------------------|-----|-----|-----|-----|-----|
|                            |    | O                | M   | R   | P   | S   | D   |    | M                   | O   | R   | P   | S   | D   |
| Enrichment with 1,8-cineol | 1  | ***              | *** | *** | *** | *** | *** | 1  | ***                 | *   | **  | **  | **  | **  |
| Sampling time              | 1  | NS               | *** | NS  | *** | *** | *** | 2  | ***                 | *** | *** | *** | *** | *** |
| EC x ST                    | 1  | NS               | *   | NS  | *** | *** | **  | 2  | ***                 | **  | *** | *** | *** | *** |

**Table S6.** Multivariate analysis of variance (MANOVA) for bacterial community structure data (relative participation of the main culturable bacteria) of mixed deciduous forest (M), oak forest (O), riparian forest (R), phrygana (P), sandy shore (S) and desert (D) soil samples enriched or not with 1,8-cineol, at different sampling times; EC = enrichment with 1,8-cineol, ST = sampling time, RP = relative participation of bacterial strains; (\*) significance at  $p < 0.05$ , (\*\*) significance at  $p < 0.01$ , (\*\*\*) significance at  $p < 0.001$ , (NS) not significant.

| Effect                     | df | Community structure |     |     |     |     |     |
|----------------------------|----|---------------------|-----|-----|-----|-----|-----|
|                            |    | O                   | M   | R   | P   | S   | D   |
| Relative participation     | 5  | ***                 | *** | *** | *** | *** | *** |
| Enrichment with 1,8-cineol | 1  | NS                  | NS  | NS  | NS  | NS  | NS  |
| RP X EC                    | 5  | ***                 | *** | *** | *** | *** | *** |
| Sampling time              | 2  | NS                  | NS  | NS  | NS  | NS  | NS  |
| ST X RP                    | 10 | ***                 | *** | *** | *** | *** | *** |
| ST X EC                    | 2  | NS                  | NS  | NS  | NS  | NS  | NS  |
| ST X RP X EC               | 10 | ***                 | *** | *** | *** | *** | *** |

**Table S7.** Multivariate analysis of variance (MANOVA) for soil respiration (CO<sub>2</sub> release) and bacterial abundance (of culturable strains) data from oak forest (O), mixed deciduous forest (M), riparian forest (R), phrygana (P), sandy shore (S) and desert (D) soil samples, enriched or not with  $\alpha$ -pinene, at the different sampling times; EP = enrichment with  $\alpha$ -pinene, ST = sampling time; (\*) significance at  $p<0.05$ , (\*\*) significance at  $p<0.01$ , (\*\*\*) significance at  $p<0.001$ , (NS) not significant.

| Effect                           | df | Soil respiration |     |     |     |     |     | df | Bacterial abundance |     |     |    |     |     |
|----------------------------------|----|------------------|-----|-----|-----|-----|-----|----|---------------------|-----|-----|----|-----|-----|
|                                  |    | O                | M   | R   | P   | S   | D   |    | O                   | M   | R   | P  | S   | D   |
| Enrichment with $\alpha$ -pinene | 1  | ***              | *** | *** | *** | *** | *** | 1  | ***                 | *** | **  | *  | **  | *** |
| Sampling time                    | 1  | NS               | NS  | *   | **  | **  | *** | 2  | ***                 | *** | *** | ** | *** | *** |
| EP x ST                          | 1  | NS               | NS  | NS  | *   | NS  | **  | 2  | ***                 | *** | *** | *  | *** | *** |

**Table S8.** Multivariate analysis of variance (MANOVA) for bacterial community structure data (relative participation of the main culturable bacteria) from oak forest (O), mixed deciduous forest (M), riparian forest (R), phrygana (P), sandy shore (S) and desert (D) soil samples, enriched or not with  $\alpha$ -pinene, at the different sampling times; EP = enrichment with  $\alpha$ -pinene, ST = sampling time, RP = relative participation of bacterial strains; (\*) significance at  $p<0.05$ , (\*\*) significance at  $p<0.01$ , (\*\*\*) significance at  $p<0.001$ , (NS) not significant.

| Effect                           | df | Community structure |     |     |     |     |     |
|----------------------------------|----|---------------------|-----|-----|-----|-----|-----|
|                                  |    | O                   | M   | R   | P   | S   | D   |
| Relative participation           | 5  | ***                 | *** | *** | *** | *** | *** |
| Enrichment with $\alpha$ -pinene | 1  | NS                  | NS  | NS  | NS  | NS  | NS  |
| RP X EP                          | 5  | ***                 | *** | *** | *** | *** | *** |
| Sampling time                    | 2  | NS                  | NS  | NS  | NS  | NS  | NS  |
| ST X RP                          | 10 | ***                 | *** | *** | *** | *** | *** |
| ST X EP                          | 2  | NS                  | NS  | NS  | NS  | NS  | NS  |
| ST X RP X EP                     | 10 | ***                 | *** | *** | *** | *** | *** |

**Table S9.** Inhibition zones (average  $\pm$  se) around disks imbibed with 5, 10 and 15  $\mu$ l of the monoterpenes examined for each of the 15 strains that were isolated from the soil of the ecosystems studied.

| Compound   | Quantity<br>(μl) | Inhibition zone (mm)                  |                                             |                                  |                                 |                              |                                     |                                     |                                 |
|------------|------------------|---------------------------------------|---------------------------------------------|----------------------------------|---------------------------------|------------------------------|-------------------------------------|-------------------------------------|---------------------------------|
|            |                  | Gram positive strains                 |                                             |                                  |                                 |                              |                                     |                                     |                                 |
|            |                  | <i>Brevibacterium<br/>mcbrellneri</i> | <i>Corynebacterium<br/>lypophylophlavum</i> | <i>C.<br/>nitrilophilus</i>      | <i>Micrococcus<br/>diversus</i> | <i>M.<br/>luteus</i>         | <i>Rhodococcus<br/>ruber</i>        | <i>Tsukamurella<br/>inchonensis</i> |                                 |
| Fenchone   | 5                | 0                                     | 0                                           | 0                                | 0                               | 5±1                          | 0                                   | 0                                   |                                 |
|            | 10               | 0                                     | 0                                           | 0                                | 0                               | 7±1                          | 0                                   | 8±2                                 |                                 |
|            | 15               | 0                                     | 0                                           | 0                                | 0                               | 8±2                          | 0                                   | 15±3                                |                                 |
| 1.8-Cineol | 5                | 4±1                                   | 0                                           | 0                                | 0                               | 0                            | 0                                   | 0                                   |                                 |
|            | 10               | 7±1                                   | 0                                           | 0                                | 0                               | 0                            | 0                                   | 0                                   |                                 |
|            | 15               | 9±1                                   | 0                                           | 0                                | 0                               | 10±3                         | 0                                   | 8±2                                 |                                 |
| α-Pinene   | 5                | 0                                     | 0                                           | 0                                | 0                               | 0                            | 0                                   | 0                                   |                                 |
|            | 10               | 0                                     | 0                                           | 0                                | 0                               | 0                            | 0                                   | 0                                   |                                 |
|            | 15               | 0                                     | 0                                           | 0                                | 0                               | 0                            | 0                                   | 0                                   |                                 |
| Compound   | Quantity<br>(μl) | Gram negative strains                 |                                             |                                  |                                 |                              |                                     |                                     |                                 |
|            |                  | <i>Burkholderia<br/>gladioli</i>      | <i>B.<br/>glumae</i>                        | <i>Buttiauxella<br/>gaviniae</i> | <i>Neisseria<br/>canis</i>      | <i>Pantoea<br/>stewartii</i> | <i>Pseudomonas<br/>caricapapaya</i> | <i>Rhizobium<br/>rhizogenes</i>     | <i>Variovorax<br/>paradoxus</i> |
|            |                  |                                       |                                             |                                  |                                 |                              |                                     |                                     |                                 |
| Fenchone   | 5                | 12±2                                  | 0                                           | 3±1                              | 0                               | 0                            | 35±4                                | 6±1                                 | 0                               |
|            | 10               | 20±3                                  | 0                                           | 5±1                              | 0                               | 0                            | 90±0                                | 13±2                                | 0                               |
|            | 15               | 25±3                                  | 0                                           | 9±2                              | 0                               | 0                            | 90±0                                | 18±2                                | 0                               |
| 1,8-Cineol | 5                | 0                                     | 0                                           | 6±1                              | 3±1                             | 0                            | 20±4                                | 0                                   | 5±1                             |
|            | 10               | 5±1                                   | 0                                           | 11±2                             | 7±1                             | 0                            | 45±5                                | 12±4                                | 12±3                            |
|            | 15               | 9±2                                   | 0                                           | 17±2                             | 13±2                            | 0                            | 52±7                                | 22±6                                | 19±4                            |
| α-Pinene   | 5                | 0                                     | 0                                           | 0                                | 0                               | 0                            | 0                                   | 0                                   | 0                               |
|            | 10               | 0                                     | 0                                           | 0                                | 0                               | 0                            | 0                                   | 0                                   | 0                               |
|            | 15               | 0                                     | 0                                           | 0                                | 0                               | 0                            | 0                                   | 0                                   | 0                               |

(I)

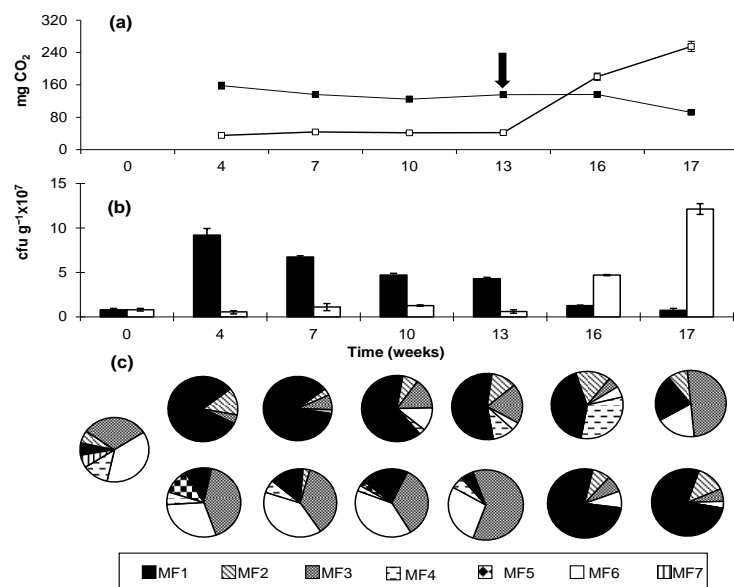

(II)

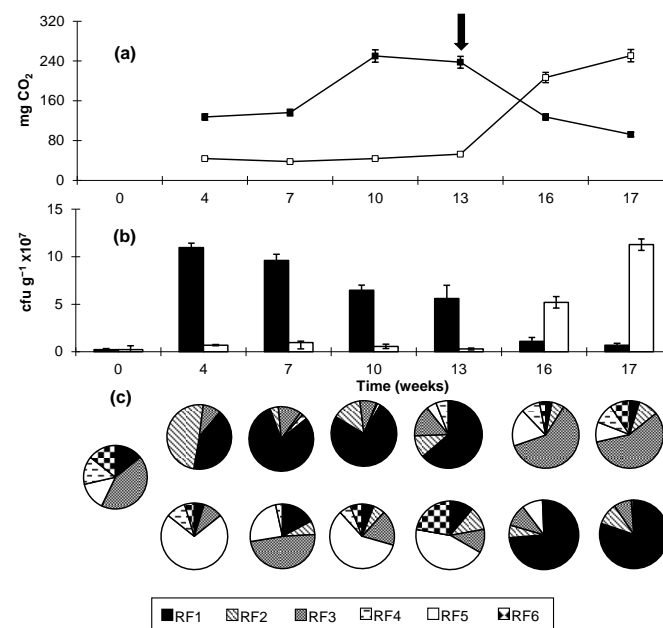

(III)

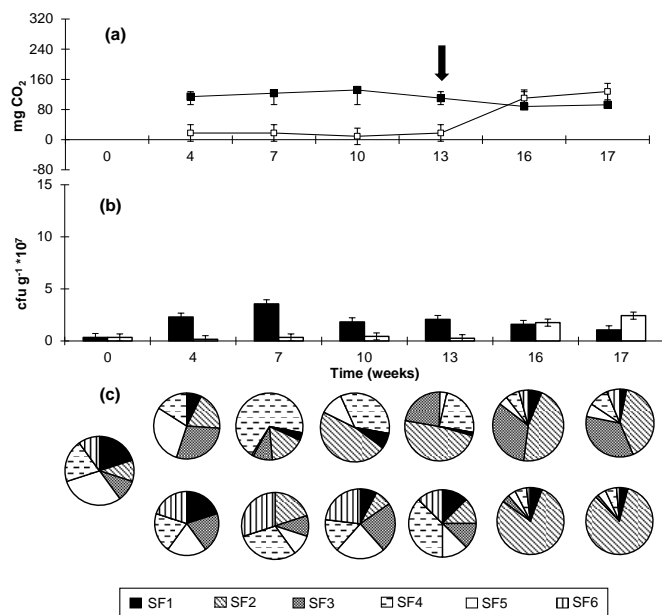

(IV)

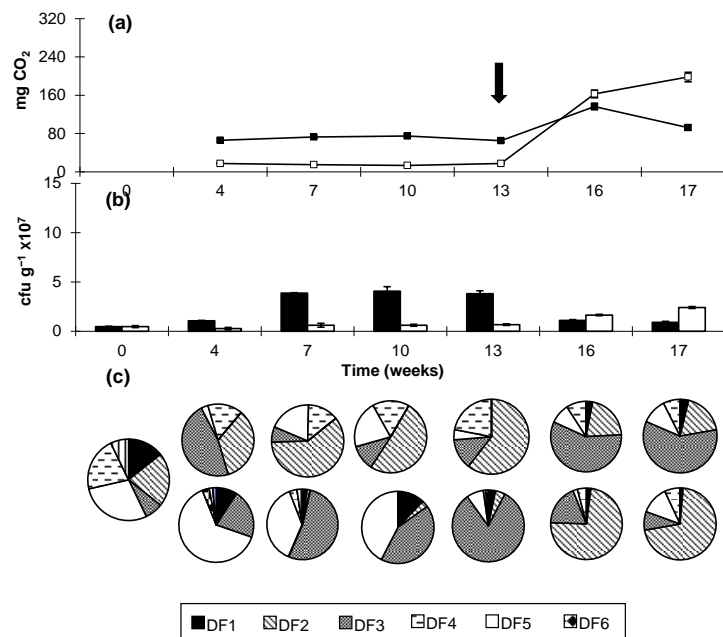

**Figure S1:** Results regarding (a) soil respiration (average  $\pm$  se), (b) abundance of the community of culturable bacteria (average  $\pm$  se) and (c) relative participation of the isolated main bacterial strains in enriched with fenchone (F) and in control soil samples, (I) from a mixed deciduous (M) and (II) from a riparian (R) forest, (III) from a sandy shore (S) and (IV) from a desert (D). Fenchone was added every week. Measurements for (b) and (c) were taken at the start of the experiment and on the 4th, 7th, 10th, 13th, 16th, and 17th week; measurements for (a) started on the 4th week. At the end of 13th week, as indicated by an arrow, fenchone addition was reversed: control samples became the enriched ones and *vice versa*. In (a) and (b), white colour corresponds to control soil samples and grey to enriched ones. In (c), the upper row corresponds to treated samples and the lower to control samples. For the bacterial codes, see note under Table S2.

(I)

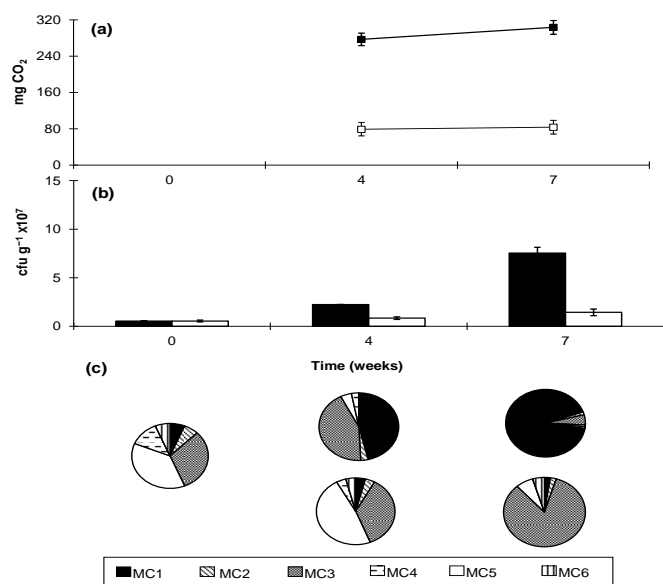

(II)

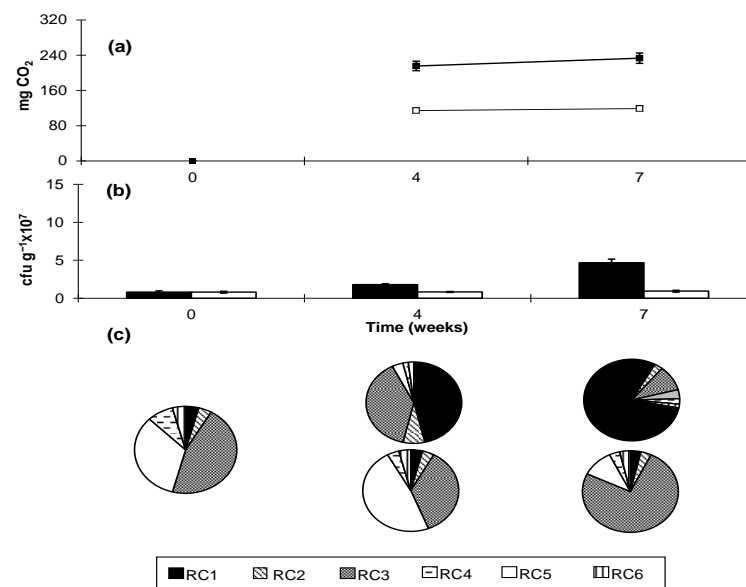

(III)

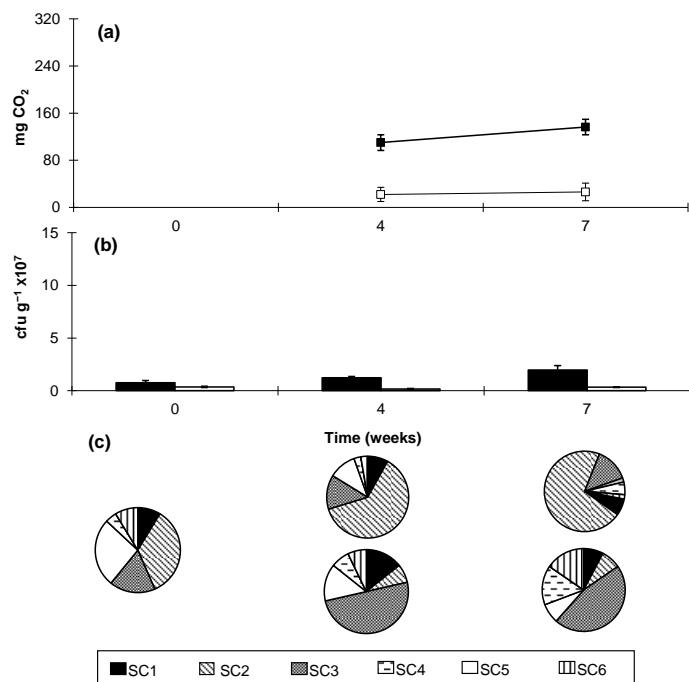

(IV)

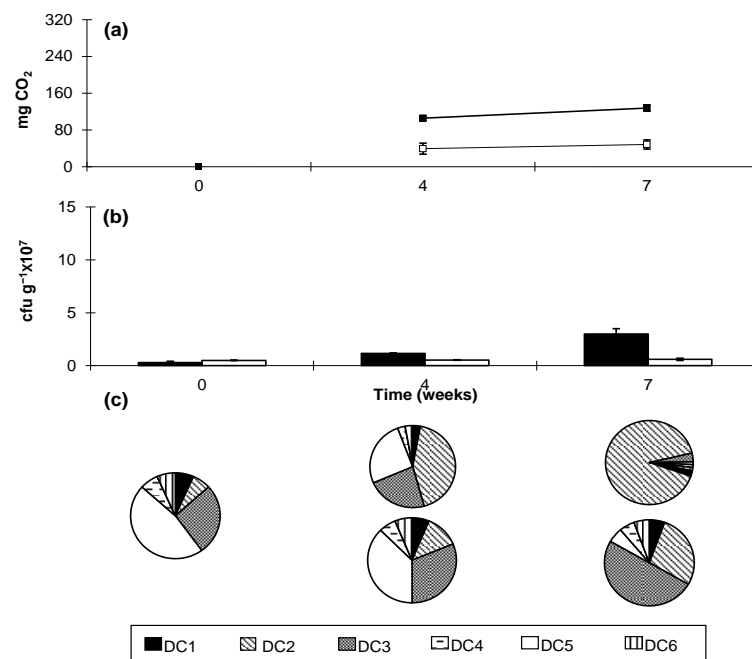

**Figure S2:** Results regarding (a) soil respiration (average  $\pm$  se), (b) abundance of the community of culturable bacteria (average  $\pm$  se) and (c) relative participation of the isolated main bacterial strains in enriched with 1,8-cineol (C) and in control soil samples, (I) from a mixed deciduous (M) and (II) from a riparian (R) forest, (III) from a sandy shore (S) and (IV) from a desert (D). 1,8-Cineol was added every week. Measurements for (b) and (c) were taken at the start of the experiment and on the 4th and 7th week; measurements for (a) started on the 4th week. In (a) and (b), white colour corresponds to control soil samples and grey to enriched ones. In (c), the upper row corresponds to treated samples and the lower to control samples. For the bacterial codes, see note under Table S2.

(I)

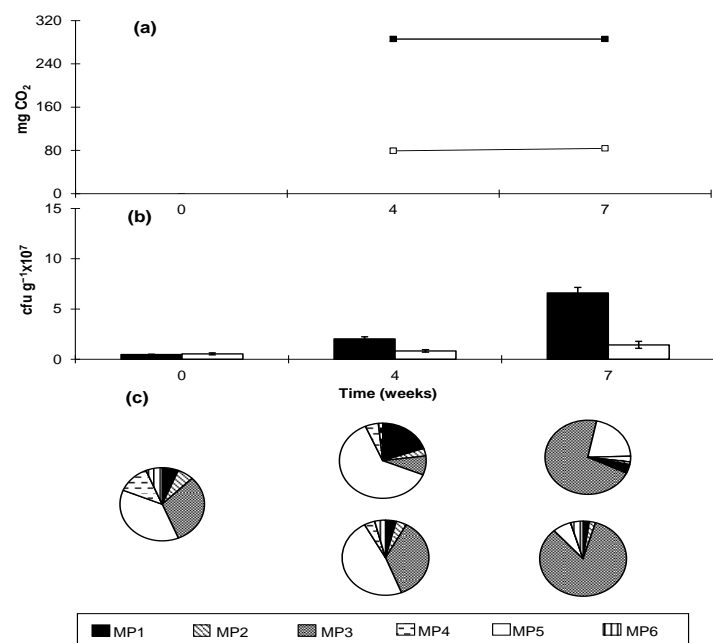

(II)

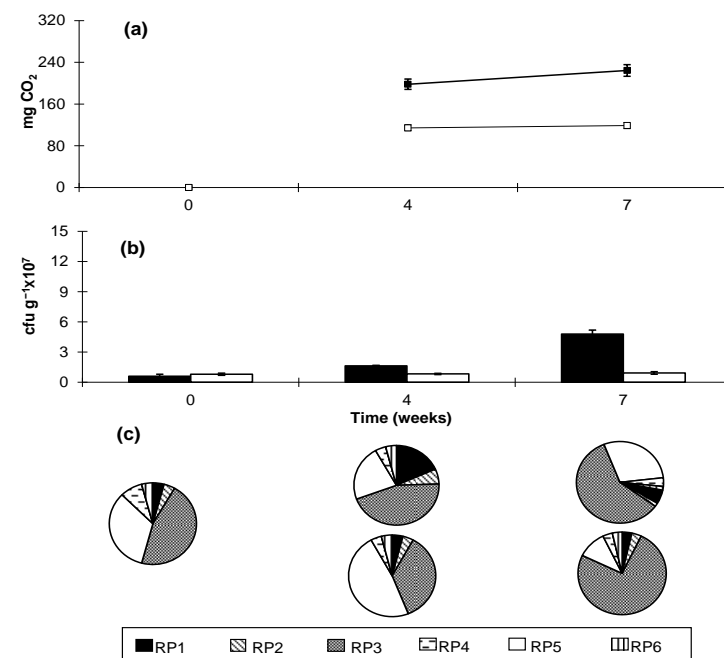

(III)

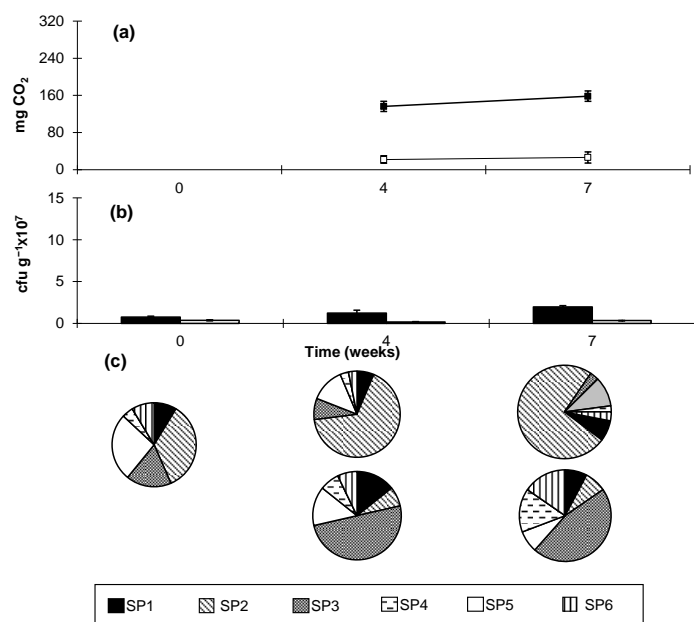

(IV)

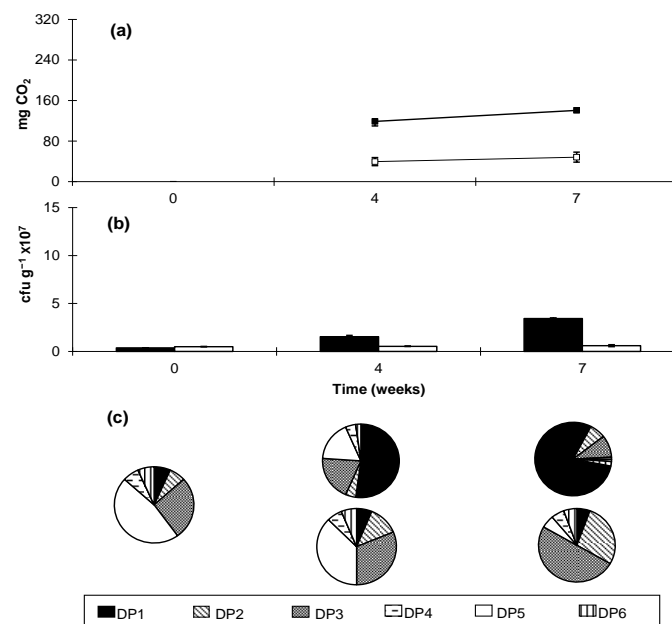



**Figure S3:** Results regarding (a) soil respiration (average  $\pm$  se), (b) abundance of the community of culturable bacteria (average  $\pm$  se) and (c) relative participation of the isolated main bacterial strains in enriched with  $\alpha$ -pinene (P) and in control soil samples, (I) from a mixed deciduous (M) and (II) from a riparian (R) forest, (III) from a sandy shore (S) and (IV) from a desert (D).  $\alpha$ -Pinene was added every week. Measurements for (b) and (c) were taken at the start of the experiment and on the 4th and 7th week; measurements for (a) started on the 4th week. In (a) and (b), white colour corresponds to control soil samples and grey to enriched ones. In (c), the upper row corresponds to treated samples and the lower to control samples. For the bacterial codes, see note under Table S2.
